# Supplementary material for: Small joint arthrodesis technique using a dowel bone graft in a rabbit model
Source: PLoS One. 2019 Dec 30;14(12):e0226996. doi: 10.1371/journal.pone.0226996 (PMC6936865; doi:10.1371/journal.pone.0226996)
Supplement: S1 File — Raw data for fusion and mechanical tests. (XLSX) [file pone.0226996.s001.xlsx]

## Sheet: DATA
No	Technique	Group	Load to failure (N)	Torque to failure (Nm)	Stiffness (Nm/deg)	Fusion
1	Conventional	1	13.3	0.46	0.037	X
2	Conventional	1	25.7	0.9	0.158	O
3	Conventional	1	25.2	0.87	0.045	O
4	Conventional	1	30	1.04	0.127	O
5	Conventional	1	18.7	0.66	0.088	O
6	Conventional	1	15.6	0.55	0.058	O
7	Conventional	1	15.7	0.55	0.028	X
8	Conventional	1	31.1	1.1	0.15	O
9	Conventional	1	38.6	1.35	0.2	O
10	Conventional	1	21.1	0.7	0.066	O
11	Conventional	1	10.2	0.37	0.039	X
12	Conventional	1	18.5	0.67	0.059	O
13	Conventional	1	28.7	0.79	0.152	O
14	Conventional	1	Excluded for infection	Excluded for infection	Excluded for infection	Excluded for infection
15	Dowel bone graft	2	14.5	0.51	0.071	O
16	Dowel bone graft	2	22.3	0.78	0.108	O
17	Dowel bone graft	2	15.2	0.53	0.025	X
18	Dowel bone graft	2	22.5	0.71	0.1	O
19	Dowel bone graft	2	31.4	1.1	0.18	O
20	Dowel bone graft	2	22.4	0.82	0.12	O
21	Dowel bone graft	2	25.3	0.85	0.15	O
22	Dowel bone graft	2	20.5	0.7	0.062	O
23	Dowel bone graft	2	18.3	0.65	0.125	O
24	Dowel bone graft	2	25.3	0.89	0.15	O
25	Dowel bone graft	2	13.6	0.47	0.074	O
26	Dowel bone graft	2	22.1	0.78	0.13	O
27	Dowel bone graft	2	24.8	0.97	0.091	O
28	Dowel bone graft	2	21.3	0.78	0.11	O
